# Supplementary material
Source: PubMed Central journal article supplement (PMC9491491)
Supplement: NIHMS1638131-supplement-supp_figure_3.pdf [file NIHMS1638131-supplement-supp_figure_3.pdf]

### Supplementary Figure Legend.

**Supplementary Figure 1.** a) Representative images showed that BMI1 (green) is expressed in the nucleus (DAPI). The mesenchymal marker VIMENTIN (Red) was co-stained. Scale bar represents 100  $\mu\text{m}$ . b) Surface markers for MSCs. Negative markers (CD14, CD34 and CD45) and positive markers (CD73, CD90 and CD105) for MSCs were evaluated by flow cytometry (Grey filled). IgG was used as a control (white). n=4. (c) Images from Alizarin Red S staining for osteoblasts. (d) Alkaline phosphatase activity ( $P=0.003$ , n=3), (e) RUNX2 ( $P=0.037$ , n=3) and BSP ( $P=0.044$ , n=3) mRNA levels in differentiation. (f) Images from Oil Red O staining for adipogenesis. (g) Nile Red<sup>+</sup> cells ( $P=0.0018$ , n=3) (h) PPAR $\gamma$  ( $P=0.009$ , n=4) and FABP4 ( $P=0.041$ , n=4) mRNA levels in differentiation. \*:  $P<0.05$ , \*\*:  $P<0.01$ , \*\*\*:  $P<0.001$ , \*\*\*\*:  $P<0.0005$  Data are shown as mean  $\pm$  SEM.

**Supplementary Figure 2. Loss of p16INK4A partially rescues the proliferative defect of BMI1 knockdown MSCs.** (a) mRNA expression of cell-cycle dependent kinase - and inhibitor - related genes in double knockdown MSCs, determined by qRT-PCR. (b) MTT cell growth assay shows cell proliferation differences between shRNAs targeting BMI1 and overexpression of BMI1 MSCs and only shp16 samples rescued cell proliferation close to SCRAMBLE. (c) Colony-forming unit-fibroblast (CFU-F) assay following knockdown and overexpression of BMI1 showed knockdown of p16 in BMI1 knockdown MSCs cannot form colonies. (d) MSCs require BMI1 for survival. Annexin V<sup>+</sup> cells increase over *in vitro* culture at BMI1 loss MSCs. shBMI1+shp27 at day 9,  $P=0,007$ , n=3. Overexpression of BMI1 reduces apoptosis. BMI1 at day 6,  $P=0.029$ , n=3, at day 9,  $P=0.009$ , n=3. \*:  $P<0.05$ , \*\*:  $P<0.01$ , \*\*\*:  $P<0.001$ , \*\*\*\*:  $P<0.0005$ . Data are shown as mean  $\pm$  SEM.

**Supplementary Figure 3. Gene expression of Imprinted Gene Network (IGN)** (a) mRNA expression of IGN in SCRAMBLE, shBMI1 and BMI1 overexpressing samples, normalized as in Fig 1b, were evaluated. GRB10 ( $P=0.0064$ ), H19 ( $P=0.017$ ), and IGF2 ( $P=0.017$ ) were significantly upregulated by

shBMI1. Other IGNs such as p57 (2.08 fold,  $P=0.26$ ), MEG3 (2.3 fold,  $P=0.36$ ), NDN (2.75 fold,  $P=0.12$ ), PEG3 (2.13 fold,  $P=0.39$ ) and PLAGL1 (1.72 fold,  $P=0.32$ ) were upregulated. n=4. (b) IGN expression levels, normalized as in Fig 1b, in osteogenesis were evaluated. GRB10 ( $P=0.026$ ), IGF2 ( $P=0.036$ ), NDN ( $P=0.003$ ) and PLAGL1 ( $P=0.029$ ) were significantly upregulated upon shBMI1 in osteogenesis. Other IGN expression; p57 (15.9 fold,  $P=0.16$ ), DLK1 (5.29 fold,  $P=0.15$ ), MEG3 (7.62 fold,  $P=0.13$ ), MEST (4.8 fold,  $P=0.08$ ) and PEG3 (3.67 fold,  $P=0.14$ ) were upregulated. n=4. (c) IGN expression in adipogenesis is shown; DLK1 ( $P=0.007$ ), H19 ( $P=0.023$ ), IGF2 ( $P=0.031$ ), MEST ( $P=0.007$ ) and NDN ( $P=0.46$ ) were downregulated upon shBMI1 samples in adipogenesis. n=4. \*:  $P<0.05$ , \*\*:  $P<0.01$ , \*\*\*:  $P<0.001$ , \*\*\*\*:  $P<0.0005$  Data shown as mean  $\pm$  SEM.

### **Supplementary Table Legend**

**Supplementary Table 1. p-value for rescue of cell growth for shBMI MSCs.** p-value was calculated in comparison of shBMI1 at specific days. Pink cells show  $P<0.05$ . Yellow cells represent  $P <0.01$ . Green cells indicate  $P <0.001$ . n=3.

**Supplementary Table 2. Nucleotide sequences of shRNAs for vector construction, real-time PCR, and overexpression.**

**Supplementary Table 3. List of antibodies.**

| Supplementary Table 1. . p-value for rescue of cell growth for shBMI MSCs |             |             |             |             |             |             |             |
|---------------------------------------------------------------------------|-------------|-------------|-------------|-------------|-------------|-------------|-------------|
| SCRAMBLE                                                                  | +           | -           | -           | -           | -           | -           | -           |
| shBMI1                                                                    | -           | +           | +           | +           | +           | +           | +           |
| shRNA for maternal IGN                                                    | -           | +           | -           | +           | -           | -           | +           |
| shRNA for paternal IGN                                                    | -           | -           | +           | +           | -           | -           | +           |
| shp16                                                                     | -           | -           | -           | -           | +           | -           | +           |
| shE4F1                                                                    | -           | -           | -           | -           | -           | +           | +           |
| Day 2                                                                     | 0.175522425 | 0.608623944 | 0.048159932 | 0.866608295 | 0.584661169 | 0.697244954 | 0.836873283 |
| Day 4                                                                     | 0.029136504 | 0.000253619 | 0.001409902 | 2.92316E-05 | 5.72962E-05 | 0.00220207  | 0.001087322 |
| Day 6                                                                     | 0.002041459 | 0.000581329 | 0.000159512 | 0.005777951 | 2.69353E-05 | 0.001463788 | 0.001742609 |
| Day 8                                                                     | 1.6379E-05  | 1.65681E-06 | 0.001674481 | 2.00508E-05 | 1.59179E-05 | 1.51406E-06 | 1.5491E-05  |
| Day 10                                                                    | 3.72337E-05 | 0.001032103 | 0.103084782 | 0.0013955   | 6.93694E-06 | 9.25735E-05 | 0.000136218 |
|                                                                           |             |             |             |             |             |             |             |
|                                                                           |             | p<0.05      |             |             |             |             |             |
|                                                                           |             | p<0.01      |             |             |             |             |             |
|                                                                           |             | p<0.001     |             |             |             |             |             |

Supplementary Table 2. Nucleotide sequences of shRNAs for vector construction, real-time PCR, and overexpression

| (a) shRNAs primers |                                                                                                                                           |
|--------------------|-------------------------------------------------------------------------------------------------------------------------------------------|
| Name               | Sequences (5' to 3')                                                                                                                      |
| BMI1               | F CCGGCCAGACCACTACTGAATATAACTCGAGTTATATTCAGTAGTGGTCTGGTTTTTG<br>R AATTCAAAAACCAGACCACTACTGAATATAACTCGAGTTATATTCAGTAGTGGTCTGG              |
| p16/p14            | F CCGGCACTACCGTAAATGTCCATTTCTCGAGAAATGGACATTTACGGTAGTGTITTTGCTAGCG<br>R AATTCGCTAGCAAAAACACTACCGTAAATGTCCATTTCTCGAGAAATGGACATTTACGGTAGTG  |
| p27                | F CCGGACGTAAACAGCTCGAATTAAGCTCGAGCTTAATTCGAGCTGTTTACGTTTTTGTAGCG<br>R AATTCGCTAGCAAAAACGTAAACAGCTCGAATTAAGCTCGAGCTTAATTCGAGCTGTTTACGT     |
| p57                | F CCGGCCACGCACTAGCTCGGTTATTCTCGAGAATAACCGAGCTAGTGCCTGGTTTTGTAGCG<br>R AATTCGCTAGCAAAAACCACGCACTAGCTCGGTTATTCTCGAGAATAACCGAGCTAGTGCCTGG    |
| NOXA               | F CCGGGCTTCTGTTCCAGATGATCTTTCTCGAGAAAGATCATCTGAACAGAAGCTTTTTGTAGCG<br>R AATTCGCTAGCAAAAAGCTTCTGTTCCAGATGATCTTTCTCGAGAAAGATCATCTGAACAGAAGC |
| E4F1               | F CCGGTAGAGACTTCAACCGTGATTCCTCGAGGAATCACGGTGAAGTCTCTATTTTTGTAGCG<br>R AATTCGCTAGCAAAAATAGAGACTTCAACCGTGATTCCTCGAGGAATCACGGTGAAGTCTCTA     |
| EZH2               | F CCGGCAACACAAGTCATCCATTAACCTCGAGTTAATGGGATGACTTGTGTTGTTTTGTAGCG<br>R AATTCGCTAGCAAAAACAACAAGTCATCCATTAACCTCGAGTTAATGGGATGACTTGTGTTG      |
| DLK1               | F CCGGAGTTCGCGAGACTTACTATACTCGAGTATAGTAAGCTCTGCGGAACTTTTGTAGCG<br>R AATTCGCTAGCAAAAAGTTCGCGAGACTTACTATACTCGAGTATAGTAAGCTCTGCGGAAC         |
| GRB10              | F CCGGTTGGACTTAAACGACGATTTCTCGAGAAATCGTCGTTAAGTCCAACTTTTGTAGCG<br>R AATTCGCTAGCAAAAAGTTGGACTTAAACGACGATTTCTCGAGAAATCGTCGTTAAGTCCAAC       |
| PLAGL1             | F CCGGCTTTGCTCTGTCTAGCTTAACTCGAGTTAAGCTAGACAGAGCAAAGTTTTGTAGCG<br>R AATTCGCTAGCAAAAACCTTGTCTGTCTAGCTTAACTCGAGTTAAGCTAGACAGAGCAAAG         |
| MEST               | F CCGGCTTGAGGTTTCATCGGGTGTCTCGAGATCACCCGATGAAACCTCAAGTTTTGTAGCG<br>R AATTCGCTAGCAAAAACCTTGAGGTTTCATCGGGTGTCTCGAGATCACCCGATGAAACCTCAAG     |
| NDN                | F CCGGCGAAATCACCAAGATGCAAATCTCGAGATTTGCATCTTGGTGATTTGTTTTGTAGCG<br>R AATTCGCTAGCAAAAACGAAATCACCAAGATGCAAATCTCGAGATTTGCATCTTGGTGATTTG      |
| PEG3               | F CCGGGACACTTGTGTAACGTATATACTCGAGTATATACGTTACACAAGTGTCTTTTTGTAGCG<br>R AATTCGCTAGCAAAAAGACACTTGTGTAACGTATATACTCGAGTATATACGTTACACAAGTGT    |
| IGF2               | F CCGGCAGAAGCCCAAAGAGCCAAATCTCGAGATTTGGCTCTTTGGGCTTCTGTTTTGTAGCG<br>R AATTCGCTAGCAAAAACAGAAGCCCAAAGAGCCAAATCTCGAGATTTGGCTCTTTGGGCTCTG     |
| H19                | F CCGGCGTCCCTTCTGAATTTAATTTCTCGAGAAATTAATTCAGAAGGGACGTTTTGTAGCG<br>R AATTCGCTAGCAAAAACGTCCTTCTGAATTTAATTTCTCGAGAAATTAATTCAGAAGGGACG       |
| MEG3               | F CCGGGGTTGTTGTGAGAATTAATCTCGAGATTTAATCTCACAACAACCTTTTTGTAGCG<br>R AATTCGCTAGCAAAAAGGTTGTTGTGAGAATTAATCTCGAGATTTAATCTCACAACAACCC          |
| CHEK2              | F CCGGTGTAAGAAAGTAGCCATAAAGCTCGAGCTTATGGCTACTTTCTTACATTTTTGTAGCG<br>R AATTCGCTAGCAAAAATGTAAGAAAGTAGCCATAAAGCTCGAGCTTATGGCTACTTTCTTACA     |
| PPARG              | F CCGGGACAGCAGCTTGGCAATATTTCTCGAGAAATATTGCCAAGTCGCTGTCTTTTTGTAGCG<br>R AATTCGCTAGCAAAAAGACAGCAGCTTGGCAATATTTCTCGAGAAATATTGCCAAGTCGCTGT    |

Abbreviations: PCR, polymerase chain reaction; shRNA, short hairpin RNA

(b) Cloning primers

| Name | Sequences (5' to 3')                                                                  |
|------|---------------------------------------------------------------------------------------|
| BMI1 | F CAATTGGCTAGCCAAGCAGAAATGCATCGAACAACG<br>R CAATTGTCAACCAGAAGAAGTTGCTGATGACCCATTTACTG |

Abbreviations: PCR, polymerase chain reaction; shRNA, short hairpin RNA

| (c) qPCR primers |                                                               |
|------------------|---------------------------------------------------------------|
| Name             | Sequences (5' to 3')                                          |
| BMI1             | F AAATGCTGGAGAACTGGAAAG<br>R CTGTGGATGAGGAGACTGC              |
| p16              | F GAAGGTCCTCAGACATCCCC<br>R CCCTGTAGGACCTTCGGTGAC             |
| p14              | F CCCTCGTGCTGATGCTACTG<br>R ACCTGGTCTTCTAGGAAGCGG             |
| p15              | F GAGGAGAACAAGGGCATGCCAGTG<br>R GCTTCCAGGAGCTGTCGCACCTTCT     |
| p21              | F ACAGCAGAGGAAGACCATGTGGACC<br>R CGTTTTCGACCCTGAGAGTCTCCAG    |
| p57              | F CCCATCTAGCTTGCAGTCTCTT<br>R CAGACGGCTCAGGAACCATT            |
| p27              | F GGTTAGCGGAGCAATGCG<br>R TCCACAGAACCGGCATTTG                 |
| p18              | F GGGGACCTAGAGCAACTTACT<br>R GGCAATCTCGGGATTTCCAAG            |
| NOXA             | F GAGATGCCTGGGAAGAAGG<br>R ACGTGCACCTCCTGAGAAAA               |
| E4F1             | F CCACGCATCTGACCTTGT<br>R CCATCTCACCGTCTCCCAG                 |
| BSP              | F ATGGCCTGTGCTTTCTCAATG<br>R AGGATAAAAAGTAGGCATGCTT           |
| RUNX2            | F CGGAATGCCTCTGCTGTTAT<br>R TTCCCGAGGTCCATCTACTG              |
| OCN              | F GACTGTGACGAGTTGGCTGA<br>R CTGGAGAGGAGCAGAACTGG              |
| FABP4            | F TGAAAGAAGTAGGAGTGGGCTT<br>R ATCCCCATTCACTGATGATC            |
| PPARG            | F TGCAGGTGATCAAGAAGACG<br>R TGGAAGAAGGGAAATGTTGG              |
| IGF2             | F TTTGTCCCTCTCCTCTCCA<br>R CAAGGCTCTCTGCCGAACT                |
| MEG3             | F GTTTCTGGACTGTGGGCTGT<br>R CAACAGCAACAAAACCTCAGAACATTCA      |
| MEST             | F TGACCACATTAGCCACTATCCA<br>R CCTGCTGGCTTCTTCTATACA           |
| NDN              | F CTGATGATGTGTGTTGGGGTA<br>R GGCTTTGCTGGTGACTTCTT             |
| PEG3             | F ACATTTCTGGTGTGAGGAGTT<br>R AGACCAGGTTCCGGTAATTCT            |
| PLAGL1           | F CATATTTGCATGTTAGAAGAATCAGC<br>R TGAGTCAGTTAGGTGAGTGTAGAGAGA |
| GAPDH            | F CTCAGTGTAGCCAGGATGC<br>R ACCACCATGGAGAAGGCTGG               |

| Supplementary Table 3. List of antibodies                                         |       |           |             |           |           |                   |
|-----------------------------------------------------------------------------------|-------|-----------|-------------|-----------|-----------|-------------------|
| Name                                                                              | Assay | Antibody  | company     | Origin    | Dilution  | Incubation period |
| IgG Control                                                                       | FC    | 559320    | BD          | mouse IgG | 1/10      | 1 hour, RT        |
| CD14                                                                              | FC    | 555398    | BD          | mouse IgG | 1/10      | 1 hour, RT        |
| CD34                                                                              | FC    | 550761    | BD          | mouse IgG | 1/10      | 1 hour, RT        |
| CD45                                                                              | FC    | 555483    | BD          | mouse IgG | 1/10      | 1 hour, RT        |
| CD73                                                                              | FC    | 550257    | BD          | mouse IgG | 1/10      | 1 hour, RT        |
| CD90                                                                              | FC    | FAB2067P  | R&D systems | mouse IgG | 1/10      | 1 hour, RT        |
| CD105                                                                             | FC    | FAB10971P | R&D systems | mouse IgG | 1/10      | 1 hour, RT        |
| BMI1                                                                              | ICH   | 05-637    | Millipore   | mouse IgG | 1/50      | 1 hour, RT        |
| VIMENTIN                                                                          | ICH   | AB1620    | Millipore   | goat      | 1/50      | 1 hour, RT        |
| Hoechst 33342                                                                     | ICH   | H3570     | Invitrogen  |           | 0.2 µg/mL | 10 min, RT        |
| Abbreviations: FC, flow cytometry; ICH, immunocytochemistry; RT, room temperature |       |           |             |           |           |                   |
