# Supplementary material
Source: PubMed Central journal article supplement (PMC9491491)

# Supplementary Figure 1

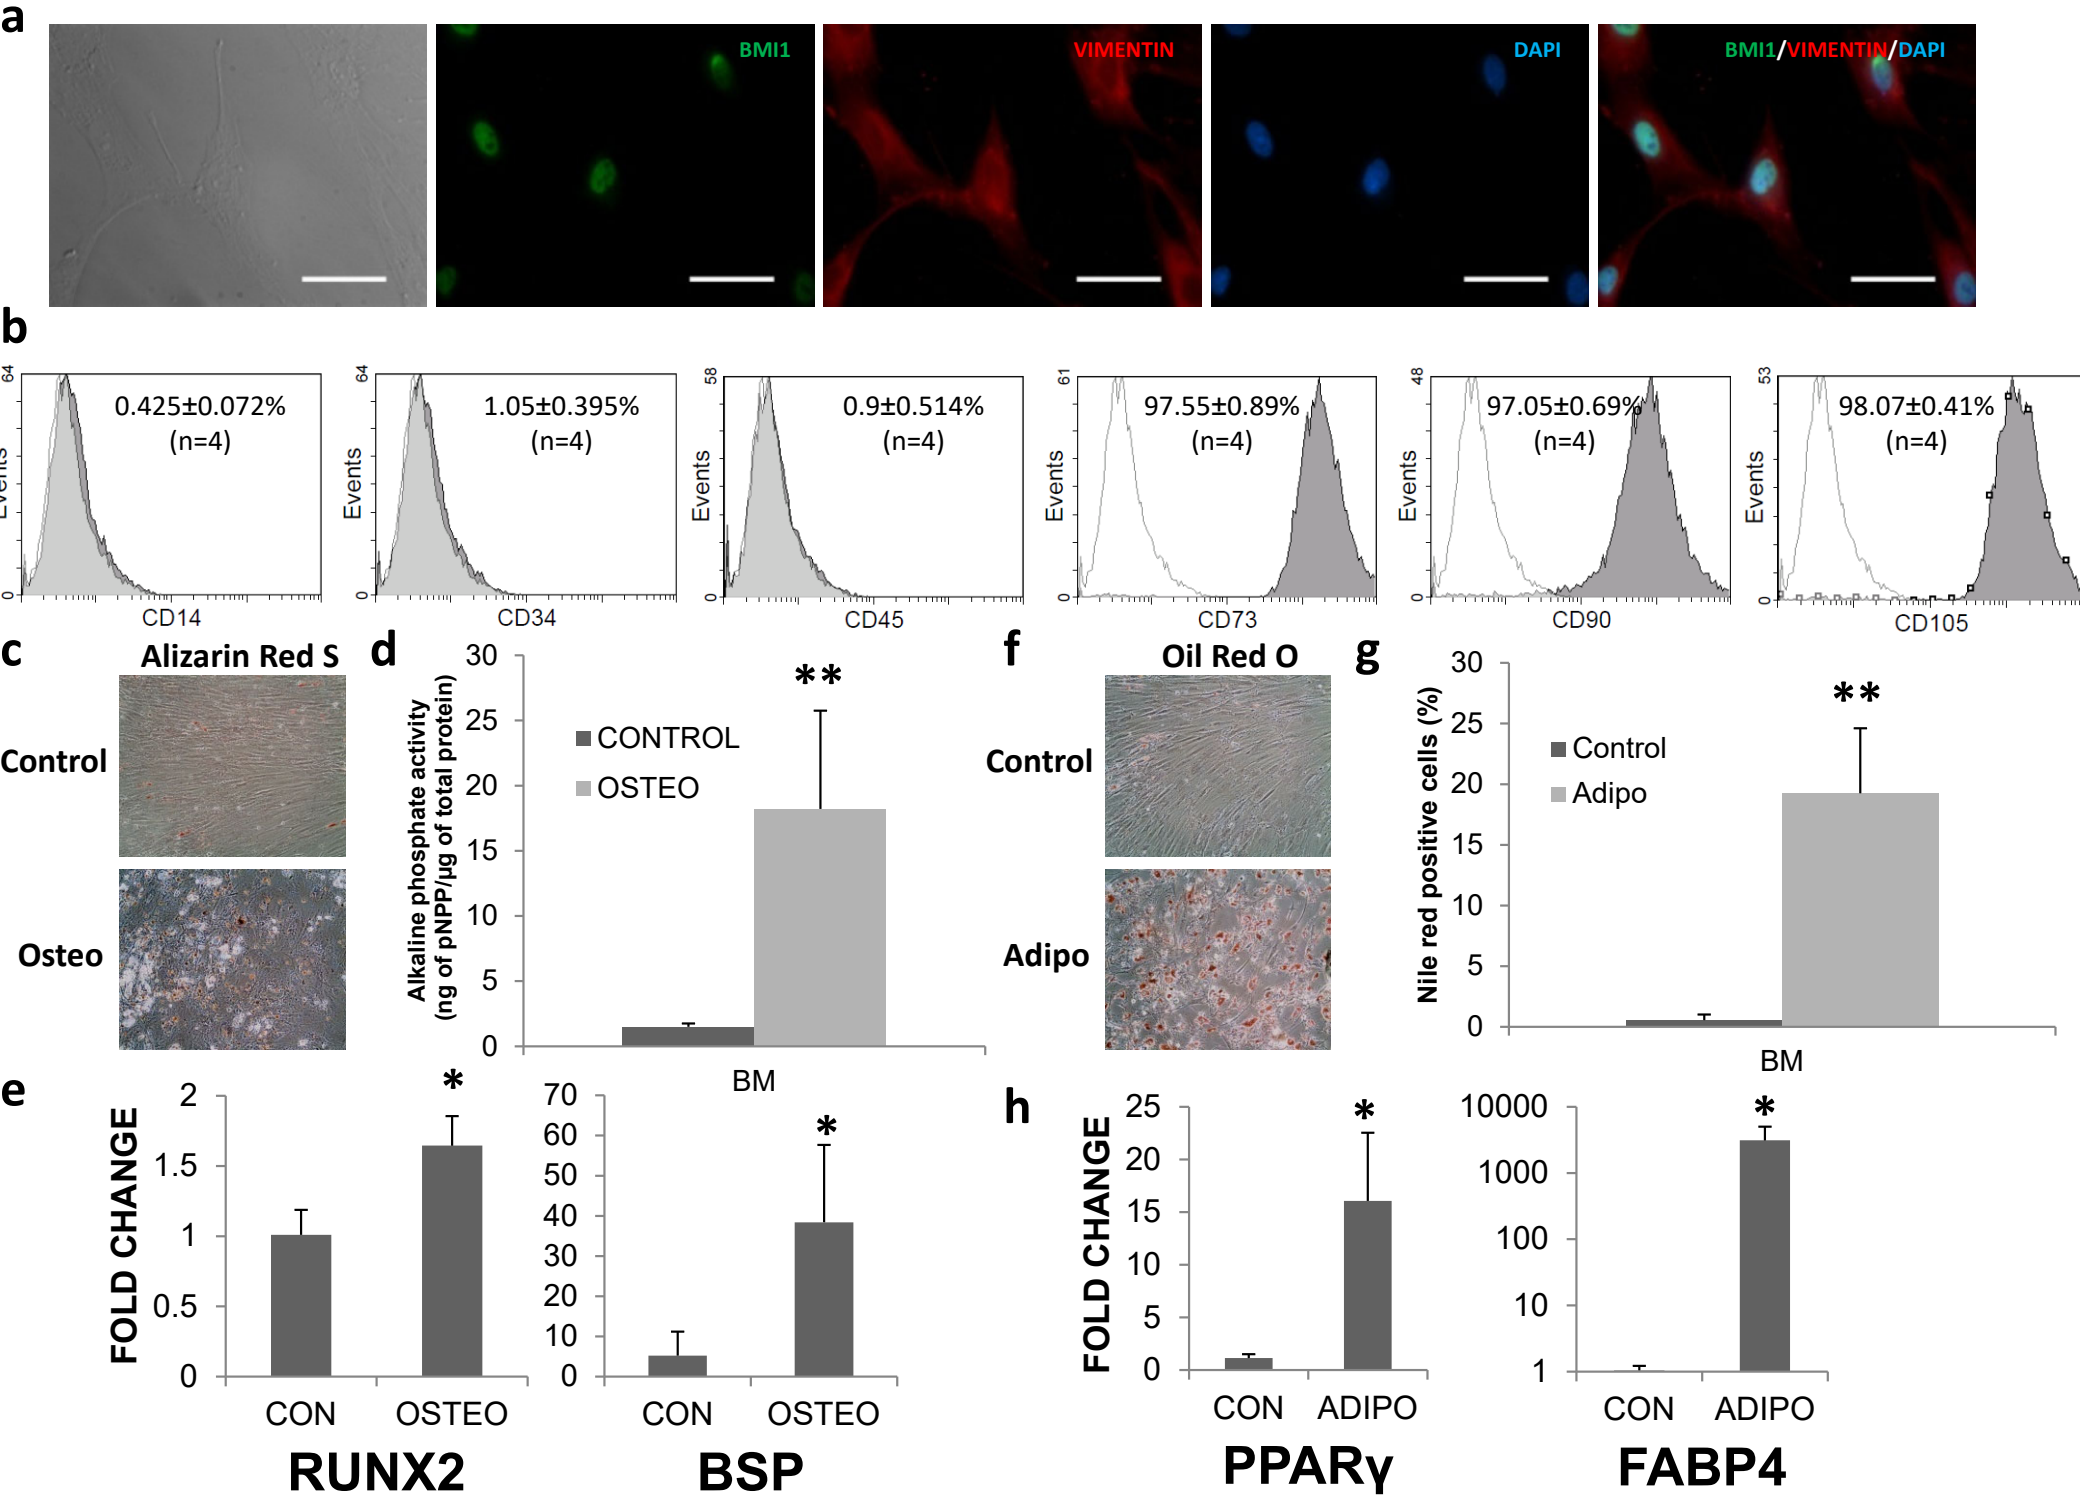

# Supplementary Figure 2

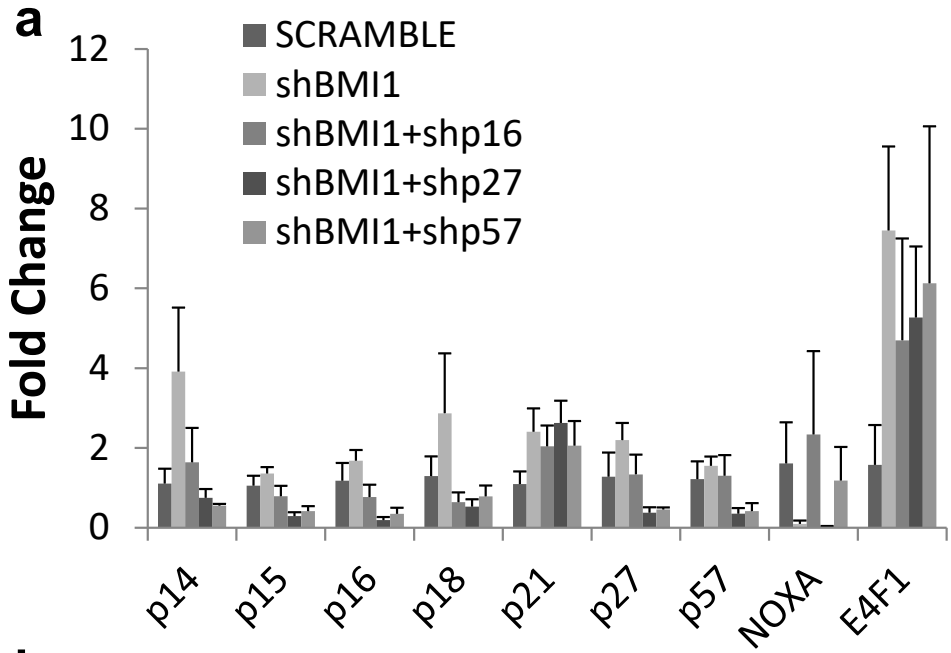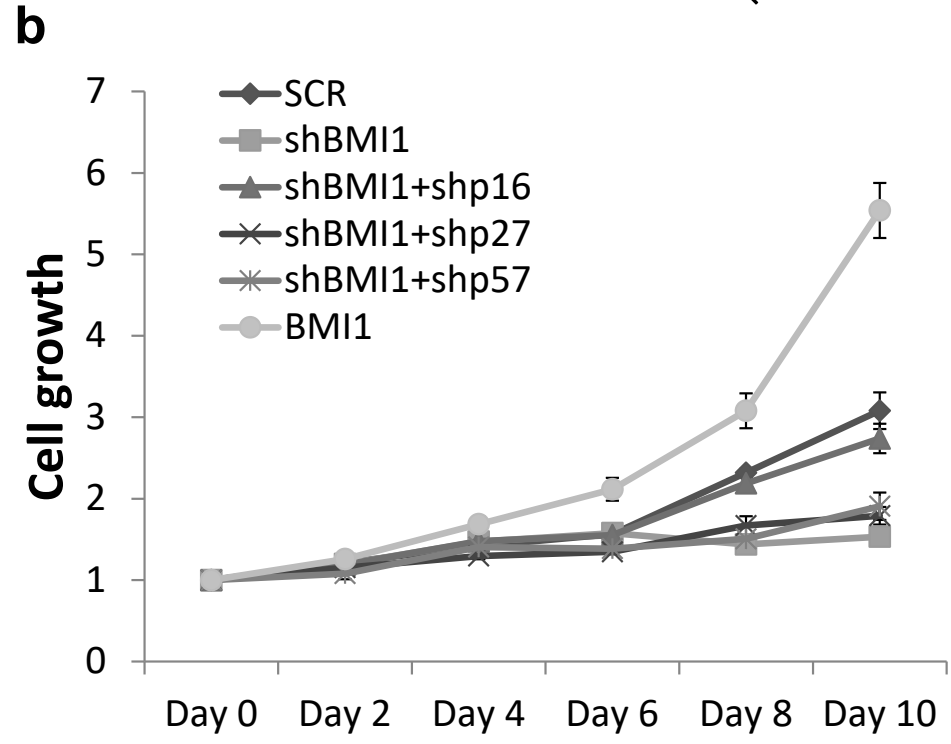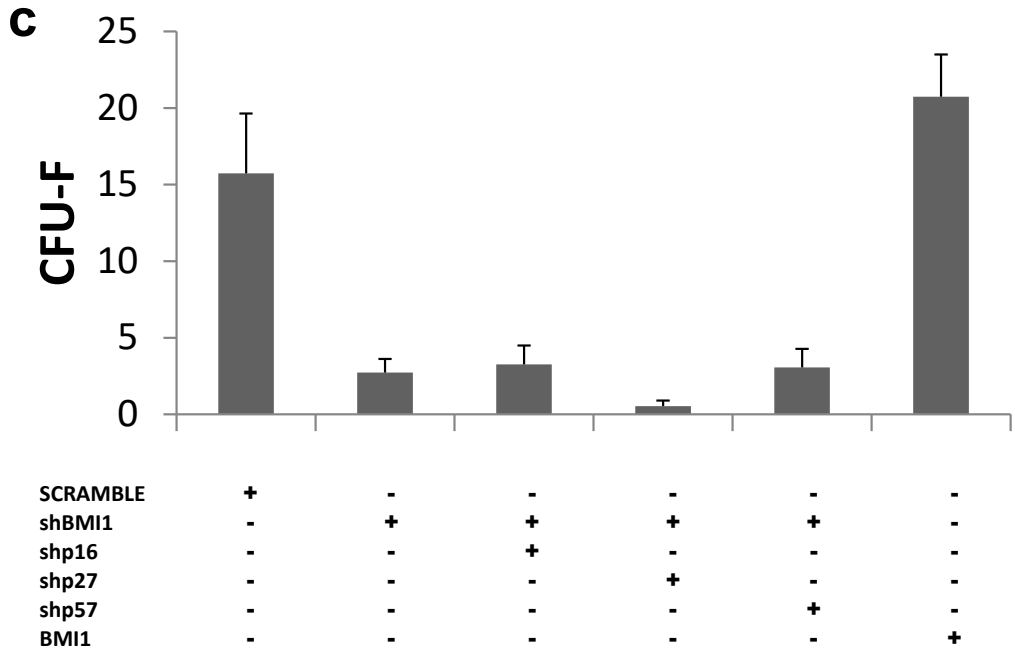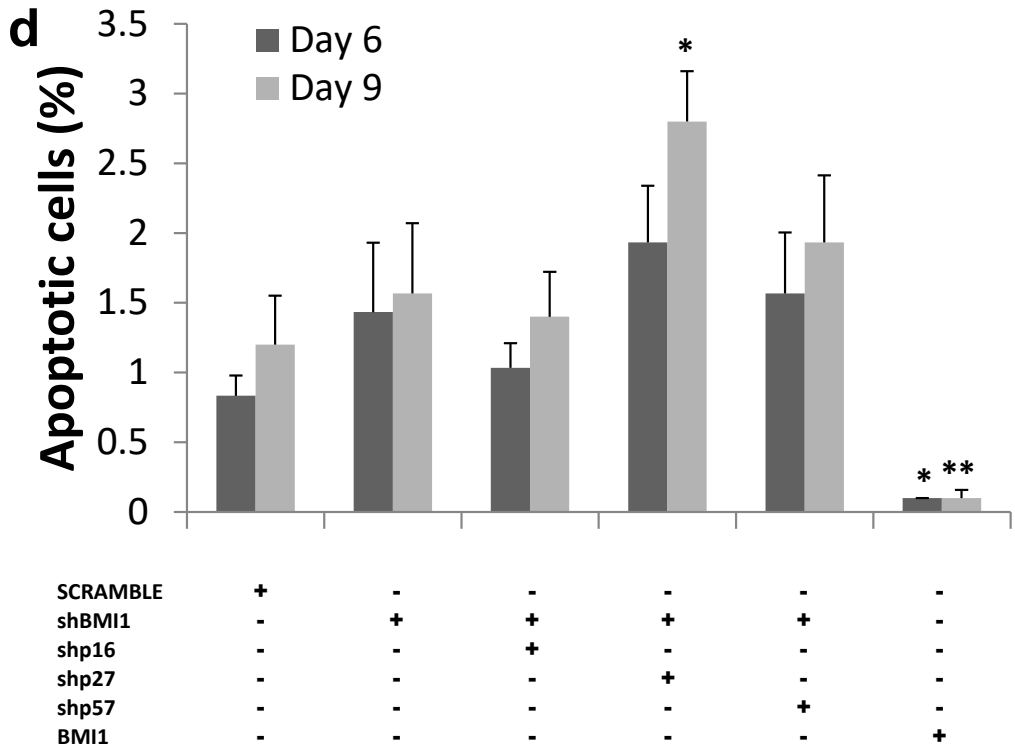

# Supplementary Figure 3

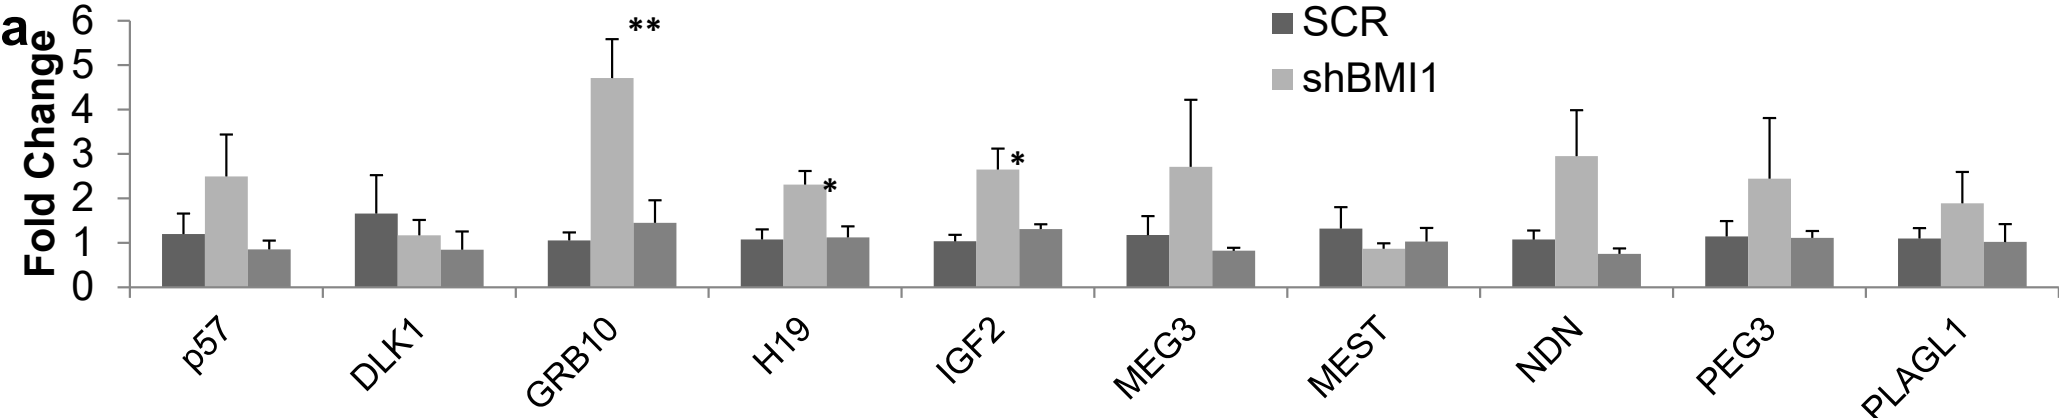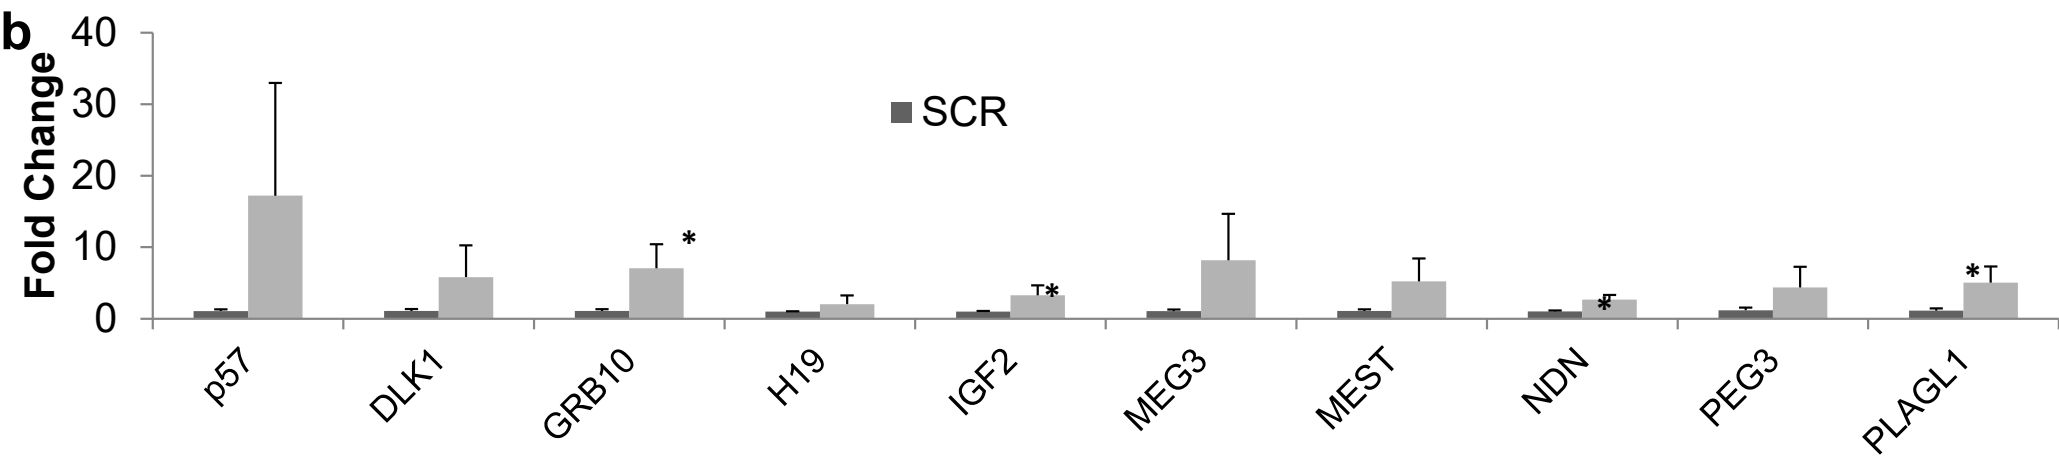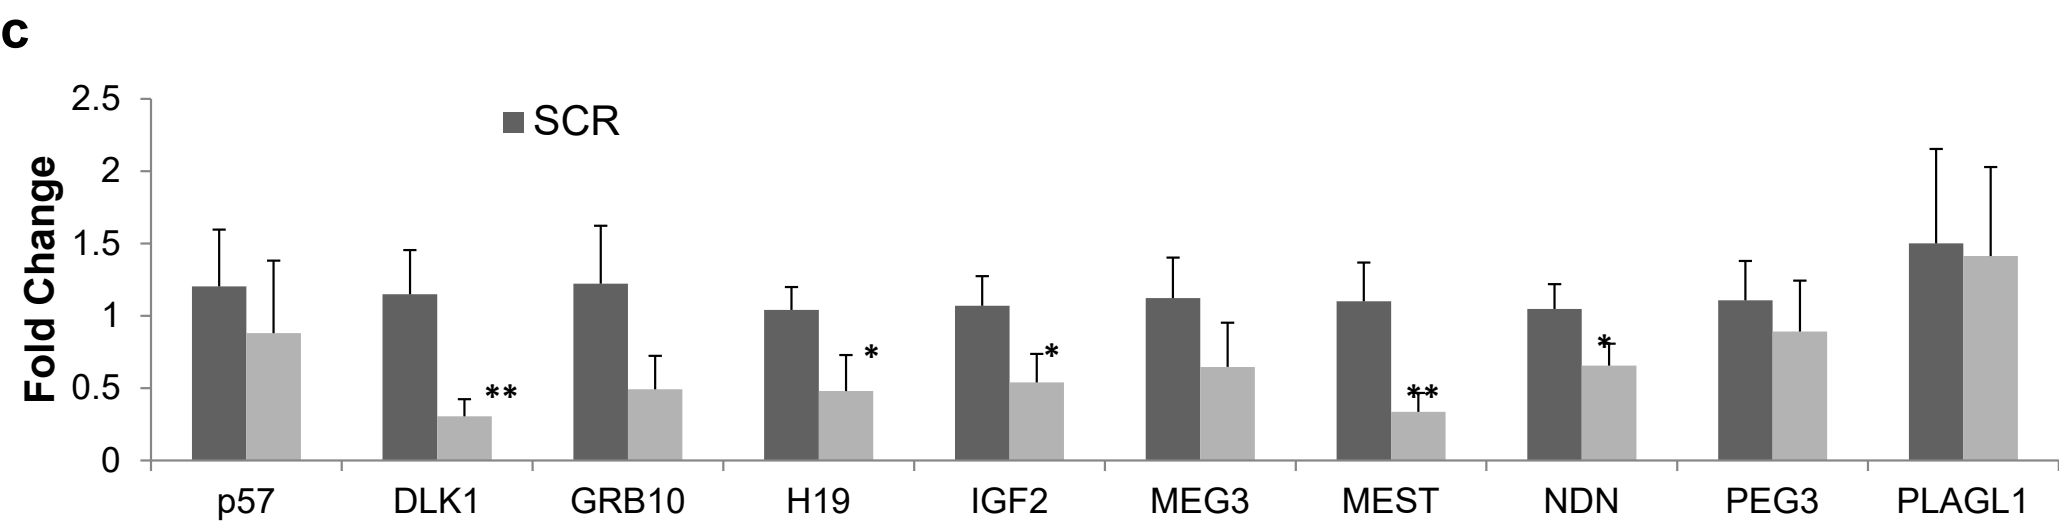

Supplement: NIHMS1638131-supplement-supp_figure_2.pdf [file NIHMS1638131-supplement-supp_figure_2.pdf]
